# Supplementary material for: Development and evaluation of chromosome segment substitution lines (CSSLs) carrying chromosome segments derived from Oryza rufipogon in the genetic background of Oryza sativa L
Source: PubMed Central journal article supplement — Breed Sci. 2014 Mar 1;63(5):468–75. doi: 10.1270/jsbbs.63.468 (PMC3949583; doi:10.1270/jsbbs.63.468), 2014-03-01
Supplement: 63_468_s1.pdf [file 63_468_s1.pdf]

Supplemental Table 1. A list of primers used for the SNP genotyping in this study

| Chr. | Position (bp) | SNP_marker_name <sup>a</sup> | Forward-primer_seq       | Reverse-primer_seq      | SNP_primer_seq <sup>b</sup> |
|------|---------------|------------------------------|--------------------------|-------------------------|-----------------------------|
| 1    | 590339        | SP-1177Ct                    | GTAGGTGCAAAGTGTGCC       | CAGCATGGTGTACCAGGA      | CTCTTTAGGGTGTACCATG         |
| 1    | 1946270       | SP-155Tg                     | TCTCCTTCCAGTCGATGC       | TCCCAAATCGCCCTCTTTGC    | AGCGACATGGTTGCTCTA          |
| 1    | 6522242       | SP-2077Tc                    | CCTAATGGGCGAATTTATAACG   | GCGAAAGGCGAGGTTGATG     | CAAAGTAATTTGGGATCTTTAC      |
| 1    | 8896815       | SP-185Tc                     | GATGTACGTCGGACTATTCATC   | CGACGTGCATGCTCATTAGC    | TTAAACATATGTCCAAAGTCAA      |
| 1    | 11026011      | SP-192Tg                     | TCCCTGCTGCTAGGATCTTG     | ATCCATCAAGTCAGCAGGTG    | GCTGTGAATGGATGCCAA          |
| 1    | 14312329      | SP-5191Tc                    | GCTATCATTGGCTAGAACACAC   | ACGGAGTTCCAGCGAATGAG    | GATCGATCTTCATTAACCTCAATCT   |
| 1    | 17803741      | SP-1208Tg                    | GAGGCCATTCTCGCAAC        | ATCGACCGAGCATTCTAGC     | TCACTCTCTCACCGATC           |
| 1    | 20366961      | SP-2016Tc                    | GCTAGAACTAATTCGCAGTAGAG  | CAATCTCGGCCACAATTACATAG | CACCGCCACTCAATTTAC          |
| 1    | 24412981      | SP-1217Ct                    | CTCCAGTGATGTTTATTTTCGTCC | CTAAACAGGTTGCATTTTGGTGC | TAAGTGTGGACTTATTTTATCA      |
| 1    | 25979477      | SP-2478Ag                    | GTTCCAGATACACCATACGG     | GCCTTAATATGGAGGAAAGCG   | TAACCTCGGTTCCAGGAATC        |
| 1    | 27840561      | SP-242Ga                     | AGCACGGCTATGTAAGACTAAC   | AGAACGTCATCGACAGCATG    | TGGACCAAACTTCACTTAGTA       |
| 1    | 31371175      | SP-262Ga                     | GCAGCAGGACAAAGGCTAAC     | ACCCTTCTTCAAGCTCCATC    | TCACAACCGGACCAGATGAC        |
| 1    | 35598472      | SP-1244Tc                    | CCTCCATTGATGTCGGTCA      | AGCAGCCCAATTATCTTTGGAC  | GGATATATTCACTCTTTTCACT      |
| 1    | 39677014      | SP-2056Gt                    | TGCTGGTGAAATGTGGGTAG     | CTCTGCAACCAACATTGCAC    | CAACAAGCACACAAGATGAAA       |
| 1    | 42000585      | SP-2079Ta                    | AACTCACCGCTGGTAGGAG      | GGCCAAGCCCACTTAATCC     | CACACCAATGGAGGATTGT         |
| 2    | 151976        | SP-3541Gt                    | GAGATGGCGTGAGTACTAAG     | GTGTAAGGTGGCTTATAGC     | TAAATCGGGCACTCTTTGTT        |
| 2    | 1758809       | SP-3547Ag                    | TAGTTGCCTAACCAAGTAGGC    | CAATCCAGATTCATAGCCAGAG  | GATTGACTACTTCCTCAATTTTC     |
| 2    | 3922571       | SP-1387At                    | CCAAACCAACCGCTTCCAC      | CCGCTTTATACACCCGCATC    | ATGCGCGCTTTTCTTTCTTT        |
| 2    | 7030897       | SP-1398Gt                    | CAACAGCTGTGCAGCAGTTG     | ACTTTCTGAAGGCGCCTGC     | GGTTTGGTTGATGAACTAGCT       |
| 2    | 9256584       | SP-29Gc                      | GGACAGGAACAAGAGAATGTG    | AAGATGGTGAGACAGGGAGA    | GTAACAGTTGTCTGGCTA          |
| 2    | 12146325      | SP-33Gt                      | GCATGTGTCACATGGTTCTAAC   | GGATGTCATGAACCCATCAC    | TTGATTTTGAGGTAGCTTTG        |
| 2    | 14655638      | SP-1413Tc                    | CCTCATTGGACGGTAAACGC     | GATCTGCTGTTGGTGAAGCTC   | ATCCACCACCTGGATG            |
| 2    | 18881343      | SP-3783Gt                    | GTCCAGATCAGTGTGAGTGC     | ACCTTTGAACCACTGCAACC    | TTCTGCATTTTCGTTGTGATG       |
| 2    | 22086348      | SP-954Tg                     | GCAGCAAAAGGTTAACGACC     | GCCTGCTGCATTCTCTAG      | CACATATATAGGTAATTTTATGGA    |
| 2    | 25263253      | SP-2941Ct                    | GTACCATGGTTGCTAAGTTGG    | CACTACACCAACCTTCTGAC    | GGCTACCAACCTCATTTTTC        |
| 2    | 27919903      | SP-1444Ag                    | ACCACACAACAAGACTCAGG     | GTACGGCGTCATGAATGATC    | AATTTGTCTGCTCTGCTCT         |
| 2    | 29345357      | SP-1450Ga                    | GGAACAACAGTCCAGGCTGA     | TGAAGCATGGACATGTACGG    | ATTGCTGGAGGCTCACAT          |
| 2    | 31272546      | SP-1461Ca                    | CTGACTGCATTTGCTTTGAAGC   | GGATGGTTCATCATCTGGTC    | GAAGGAAAAGTTAAAGGATGAT      |
| 2    | 33189264      | SP-1471Ta                    | TGGTGAGGGATGATTCATCC     | GTATGGCAGTATGCTGGTTC    | GCAAAGCAGTTACATATACT        |
| 2    | 35267219      | SP-3571Ta                    | GAAGGCAGCCAGATGAGC       | CACTCGCTCTGTATCAATTGG   | CTCATCTCCTGGCTAATATC        |
| 3    | 577726        | SP-111Ag                     | GCGTCGTGGATGATGACG       | GCCTCCTCTTCGGCTTCG      | GTAGACCTCGTCGTAGGA          |
| 3    | 3979349       | SP-1289Cg                    | CATGCAAGAATTGACCTGGC     | GCTTAACACTGACGATCGGATC  | GGTCTCGGAATTCACCT           |
| 3    | 6660541       | SP-1302Ct                    | GTAGAGCCGGTAGATAGTC      | TCAAACCGAGCGGTGAAC      | GATGCCTCACTTTTTACAGA        |
| 3    | 8780254       | SP-1311Ga                    | TAGGTAATGCTCCGCAAGTTC    | CTTGACCTGCCTTAATGTGC    | AGAGCATGGAACAGGACA          |
| 3    | 11073623      | SP-1323Ta                    | CTATGGAAGAAGCTGCATCG     | CATTGATGCATTGATTGGGAGAC | GATTGTTGAGCGATTTTCGAG       |
| 3    | 13984287      | SP-1331Ga                    | CAATTGTTTCATCGGCCTCAG    | TGCTGCAAATGGTGAAGTGC    | CAGTATGTGATCTAGAGAAAAAC     |
| 3    | 15737302      | SP-294Ct                     | GGCACGGATCTGATACAAG      | TGCAGTTCCTGTGCCATCG     | GAGCTACCCAGAAATTTAGC        |
| 3    | 19071470      | SP-3143Ag                    | GATCTGCTTAACTCCAGTGC     | GACATTGGCTCGGTTTAGAG    | GTGGTTTCTTTGTCTTTATTTCTT    |
| 3    | 22287129      | SP-306Tg                     | CATATTCTACAGCGTTCTCGTC   | AACACCAAGGGCGATCGAG     | ATACCGAGCCCAGCAAT           |

| Chr. | Position (bp) | SNP_marker_name <sup>a</sup> | Forward-primer_seq      | Reverse-primer_seq      | SNP_primer_seq <sup>b</sup> |
|------|---------------|------------------------------|-------------------------|-------------------------|-----------------------------|
| 3    | 24488442      | SP-3148Ac                    | GTCTGATCGATCGAGCAATC    | TGCACAGTGGATTACGCTAC    | TGTCCAATGCAACATCTCC         |
| 3    | 26352992      | SP-3135Ag                    | TAGCAACTAGGACAGATGGC    | CTCAGTTCATCATCAGGTTAC   | GATGTAATCCGCAAACACTGCATA    |
| 3    | 30021442      | SP-1355Cg                    | CCTAGCAGCAAGATATGAACTG  | GCCTGAATTCTGCAATACATTGC | CTATGGATGGATCCAGACA         |
| 3    | 31580078      | SP-334Ct                     | GCGTGACATATAGCAATTCCG   | GGTGTTCATCGCCATTAATGG   | GCAATTACGACTCACGAATTCT      |
| 3    | 33640115      | SP-348Ga                     | CCAGAGAACCCTTTTATGTACAG | CCGAGACATGATATAGTAACAGC | ATTGGATTTTCGCATTTTTCG       |
| 3    | 35945011      | SP-362Tc                     | CTGTGGTTAGCTCCTAAGGC    | AGTCAGGACTCAACTCAAGC    | TCTACAGCGCAGATTTCGG         |
| 4    | 218809        | SP-2590At                    | CTACACATTAGCTCGCTGGA    | CACTGCACAACAATCAAGATCAG | CCATTACTTCTATACGTGATA       |
| 4    | 2471151       | SP-2595Ga                    | GCCAAAACACTAGTGAGTGAG   | CACCACAATGAGGTATCCATC   | CATGTTTTTGTGCATCCTAGTT      |
| 4    | 6456488       | SP-372Ct                     | CTGACAATTGATGCAGACGC    | CTGCAGACTCCTTCTAAGC     | CGTGACCTCATTCTCTGAAA        |
| 4    | 8285219       | SP-3233Ag                    | CAAATGATTGGAGACCAGGAC   | GATGGCATATCTCGTAGGATG   | GTTATTTAGCTCATAATTTGCC      |
| 4    | 11949079      | SP-375Tc                     | GCTTATTCTGACAGGTTGCC    | CATATGACTGATTGGATGGAGC  | TCCAGGTCTAGCTTATTGC         |
| 4    | 19650008      | SP-386Tc                     | AGTGCCTGTCAGGATCAG      | GGATTCAACTGACGAGTATTGC  | GTAATCTATCTTGATGGAGTATTA    |
| 4    | 23043128      | SP-3269Tc                    | CCTTAAATTAGCAGGACCTGTG  | GAAAACCGCTAATTGACCTCAG  | AATAGTCAGTAGTCACCTGC        |
| 4    | 25877141      | SP-402Ga                     | CTTGGTTCATTTCTCCAGAAG   | CATAACTGAGCACCTTGGTG    | CTCTTAAACAACACTTTTGGCA      |
| 4    | 28349285      | SP-409Ac                     | CAGAGCAAATTGGCTGCC      | GTATGGCACCATGCTTATCC    | CCATTTCCACAACCTTTAGTTTG     |
| 4    | 32342809      | SP-423Ga                     | AAGGAGAGCTTTGAGCACG     | GGATCAACTTGCTTCAGCTC    | CTGGAGGGTGTGCCTTC           |
| 4    | 34498729      | SP-436Ct                     | CTCAGTAAGAAGGCACTCG     | CTTGTAGCTAGCGCTTGTC     | CTCTGAATGTATCAACCAACATA     |
| 5    | 40031         | SP-487Ag                     | CCTTGATCGAGTTTGAGCTG    | CCCATCAACCATGATTCCAC    | ACATACCGTCCCTCCTAC          |
| 5    | 1047930       | SP-495Tc                     | CCAGTCAAAGCCTCAGACC     | CTCTCAATGCAAGGTCTGAC    | AGGATGACAAGGGCGATTA         |
| 5    | 3173133       | SP-505Ct                     | ACAAGATCCTCAAGCATGGC    | CATTCATGAACACCGCGTTC    | CAATGTACTTGAAGTTCGCTCAT     |
| 5    | 5073404       | SP-516Tg                     | CTTGGTATAAAGCCGGTGTTT   | CCAACGTCGAGGTCTGAAG     | AATTGCAGTAGCCCTGCT          |
| 5    | 7305956       | SP-1526Ga                    | GGTGATGCATGACCTAGG      | CCACCTTGCTGGTGATCA      | GCTCAGCTGAGACTTGT           |
| 5    | 12908872      | SP-526Gc                     | CCGACCGTCATTGTGTAGTG    | GTTCTGGCCAATATGGCTTG    | AGTCATCTTGGCCAACAGTT        |
| 5    | 15459785      | SP-1537Ac                    | CAATGATGCCAGGTCTGACAT   | TATGCAGGACACTCTCCATG    | TGTACAGTCAATAATGCACTTG      |
| 5    | 18878114      | SP-1546Tc                    | CTGCTTGAATGATTCAAGTGGTT | GTACCGTAGTTGAGCATTGATG  | TGACCAGCAAATCTGGGA          |
| 5    | 21331373      | SP-548Tc                     | CTGTTAGGTGGTAGTATTAGCC  | AACCGAAGACATGGATTTCC    | CGGAAAGCGGCGGAGA            |
| 5    | 24581478      | SP-563Ct                     | ACTTGAGAGCCATGGACTTG    | AGCTCACTGAGAGTAAGTGC    | CAAGAAGTTAGCTTGTCTGGA       |
| 5    | 26499154      | SP-1573Ag                    | CATGTTACGTAAGAGCACATG   | TCAGTCACTCCGGTATCG      | CCACAACACAAAATAGCATTAGTTTC  |
| 5    | 28699770      | SP-3325At                    | CTCTGGCTGCAAGTCATCAC    | CTTCTGAGGATGATTCCAGC    | ACACATACCTTCTTGGGAGT        |
| 6    | 372258        | SP-590Ag                     | CAAGTTCATGTCAAGCTCGG    | GATGGAGCTTACAGCCAG      | TGCCGCCAGGTACATG            |
| 6    | 2584447       | SP-2505Ag                    | TCGTGGAGCTATGTCTGGAG    | GTGGATGGCACACATTAATACAC | TACCACTAAACCATGCCTAG        |
| 6    | 4185220       | SP-600Ct                     | GGACTGTCACTATCATAGGC    | CGTCTGAAACTGTGCAATGTAC  | CACTATCATAGGCACGTTTC        |
| 6    | 6290821       | SP-2510Ct                    | GCCATGTAACACAAACAGTGG   | TGGTGCTGGTACAGAATAACC   | ACAATTTTCCGACATATCT         |
| 6    | 7554759       | SP-611Tc                     | CTGAAGTATCCTGCTGACC     | CTCCCTGAAGATATGCAACTTG  | GTGTTGCCATTGAAACTGTG        |
| 6    | 10671175      | SP-1603Tc                    | CCTAGTCCCTAAAGATCTCATG  | GATAGACTGACGAGAGAAGTG   | GGTGGTGTATCTCTAGT           |
| 6    | 13689109      | SP-3005Ct                    | CTTCTGAGTGAATCGACGAC    | ATTTGCTCTGGTGGAGATGG    | GGTATTAGCTAAGCAATCACA       |
| 6    | 16525923      | SP-2270Ta                    | CCTAAACAGAAGTGCCAC      | GGTGCACGATTGAACTCTATG   | CCAGAGGAGGCTTCAGA           |
| 6    | 20235922      | SP-3022Cg                    | GGGTGGATAAGTCAACTACTG   | GGCCTAATATGTATGTTCTTGC  | TTTACGGCAAACAGATCTT         |
| 6    | 22907151      | SP-1613Ga                    | GAAATCACATCCGATGACTGG   | CACTCATATGTGGATGTGTCAG  | CAATGGCCATAAGGAAATGC        |
| 6    | 25711515      | SP-3026Tc                    | GGACACTTATCTCAAGGTTTAGG | GCACCAAGTTCACTCATGGC    | CAAAGGGCAACAATCTCT          |

| Chr. | Position (bp) | SNP_marker_name <sup>a</sup> | Forward-primer_seq      | Reverse-primer_seq       | SNP_primer_seq <sup>b</sup> |
|------|---------------|------------------------------|-------------------------|--------------------------|-----------------------------|
| 6    | 28329768      | SP-1629Ac                    | TCCTTCTGTGTACTGGCATC    | ACAACCGTGTGGATGCACTG     | CCTAAGGGAGCTGAAACT          |
| 6    | 29975546      | SP-673Ca                     | AATCGTGGGTGATGGGTCG     | CATGCGGCGTAGAGTAGG       | AAGGCCTGGAGGAAGG            |
| 7    | 260864        | SP-676Ta                     | GTTATAACCCTGCACACATGAC  | GTCGTTTCGTCGTCATTTCTG    | CTGGATTTGTTTTACAAAAACCAA    |
| 7    | 1743980       | SP-4168Ag                    | ACATGGTTGTCATCGATGTCC   | ATCTTCGCTATGCTTCACACG    | GTCTTCCTGCTGAAGATGAC        |
| 7    | 3898132       | SP-683Ga                     | GGGATCTTCAGTAGTAGCAAC   | GCCACTATAGTTGGGAATCATG   | CAAAGGTATGGAACATAATACA      |
| 7    | 6843696       | SP-1648Ta                    | CACGGGAACATCATACTGC     | GTTAGGTGTCTTCGGCAAG      | TGTAATGATACCTCACTCCA        |
| 7    | 10130032      | SP-3066Ag                    | GCAGGGCCATCTTGATG       | CAGCTTCACTCTCACATTCAG    | TATGGAACAAAGGCGCCAT         |
| 7    | 13302019      | SP-1657Ag                    | TCAGCCAGAGCGATCTCTG     | CTATGCGGAATCATACTAGC     | CTCTTTCACCAGCAATAGCT        |
| 7    | 17327528      | SP-2345Ga                    | ATGCTCGACATGGCATTGC     | GCGATATCTACAACACCAAATCAG | TGCTTATGTGTGCCAGCA          |
| 7    | 18571959      | SP-1662Ct                    | CGCAGCAGTAAGTAGGTTAC    | CGCCAAATGGATGTAGAAATGC   | ACTGACAGTCTGACACCAA         |
| 7    | 21942076      | SP-3095Gt                    | CATTTGGATGGATCGTGAGTG   | GGAAACATGAGGCCGTA        | TACTACGAGTCAACGGATTA        |
| 7    | 25490053      | SP-741Tc                     | CAGAGCTGGCAACTTATGTAC   | AGCTTCCTTAACTGGACCAC     | TGAAGAAGCTGAAGGACTTG        |
| 7    | 27473590      | SP-749At                     | GTCACAAGACACTACAACATGC  | TGAAACCGCGGATTTAACGG     | GAAACAACACAAGGAAATCC        |
| 7    | 29361700      | SP-2356Ag                    | GTTCTGGAAGTAGAATGTGACTG | GAACAAGTTTGGGCAGTGAG     | TTGGCACTGCCTGTAG            |
| 8    | 195223        | SP-761Tc                     | TGAAGATGTACACTGCGTCC    | AGTTCTGCAGTTTCCACACG     | CTTGCTAGTTGTACCCAA          |
| 8    | 1669653       | SP-976Ct                     | CAGAGATCAACACACCAATGC   | CACCAAGACATGTCGGTTC      | GCAATTA                     |
| 8    | 3553188       | SP-2551Tg                    | GGATAGCCTTGCCTTGGAG     | CAGCAACAATGGCTAATTGCG    | CTTTCAGTCAATCATTGGACA       |
| 8    | 5278855       | SP-3598Ag                    | CCATACCTGAAGAACTGTCC    | GGATGTTAACTGAACACTGG     | TCAGAGTTGAAGTGCATCCT        |
| 8    | 8094582       | SP-795Ct                     | CATTGCATGTGGAGGCTTG     | GCGGTAACAACGAGCATG       | CTTTGGCTGGCTGAAGAAA         |
| 8    | 10572009      | SP-1707Tc                    | ACGTGCAAGGTGTATGCC      | CTTGTCTACTGCTACCCGA      | CAGCCTGTGTTACTCTGTT         |
| 8    | 14520452      | SP-3608Cg                    | CGTGAATGAATGGCGATCTG    | TGGGATTAGTGTGGCTCTTG     | CCTCTTCAAGATAATAATGCTA      |
| 8    | 18114324      | SP-809Tc                     | GCTTACATCATGATGCACGC    | CAGACTCCATTCTCAAGACC     | GCTTTGAAGAAAAGGCATC         |
| 8    | 19903905      | SP-3199Tc                    | GAGGCCCTATAAGTTTGATTGG  | CATGCGCACTTTCTTAAACGC    | ACAAACGCAGACCCTCATAA        |
| 8    | 23167567      | SP-2408Gc                    | CTCTTGTGGGAAAGTAGGAG    | CAGTGGAGTAGCTAGCACAG     | CTGAGTCCCCTTTGCT            |
| 8    | 25921712      | SP-1734Ac                    | CTACTGTGCCGAGATTGC      | AAGGAGAATACTTGGAGGCG     | GTCACCAACAAGCTTGC           |
| 8    | 27758654      | SP-844Tc                     | GTTTGCTTCCTAGCTACAAGC   | ACAGTAACACGGCGAGTG       | CAAATGTCTGAAACAGTTTGTA      |
| 9    | 1             | SP-3968Tg                    | TCGAGGTGACACCAAATGGC    | GCATTGCAACTTGGAAGTTGTG   | AACTTAGTTCACTATACTTGAA      |
| 9    | 452497        | SP-2183Ag                    | CAATGTACGATGTAAACGACAGC | GCTCCTCTGGAAGGTAAG       | CCGTAAAATTTCTCAATCCAAA      |
| 9    | 3066192       | SP-866Ta                     | CAACATCAAACACAGAGAACGAG | GTTTGAAGAGTTCTTTCTAGCC   | CGGAGCCATACATTATCATC        |
| 9    | 5167966       | SP-2129Tc                    | AGTGCTTCACGCGATAGTCT    | GTTTCACCAACCTAGTTACGG    | GTATTGAACGTTGGGTCCAT        |
| 9    | 6999573       | SP-2144Ag                    | GACATCTGCCATTGTGTCC     | GCGGTTGCAAACTTGGTATTC    | CAACTCCATGTAATGTGGATAC      |
| 9    | 10483155      | SP-875Tc                     | GCGATTGAAAGAAGCTAAC     | GTTGCGAAGAGTACAAAGGC     | CTAACAACTATGAGGTTCAATATA    |
| 9    | 13253953      | SP-2180Tc                    | CTAGGGAGTCAAATTACACCG   | TACATTCTGGGCACCGTTCA     | CATACCCCTTAAACAAGAAAAC      |
| 9    | 15063825      | SP-1747Ga                    | CAACAGCAAGATTGGGAAGC    | GCAACTGCAATCAGTATACGG    | CGGCTTTGTATTGCCAATTT        |
| 9    | 17880593      | SP-909Tc                     | TGCAGTGCAGTACTACATCG    | CAGCTACAGATGTACACCATAC   | ATACCAATTTCTCTGACATG        |
| 9    | 19336407      | SP-1761Ct                    | ACAGCCATGCTCGACTTCAG    | GCAGCAGAGGAGATGTTCTC     | AAATGAAATGAGCACCTCCT        |
| 9    | 20652100      | SP-2125Tc                    | GGATGAACATGTAGGGTTCCG   | GCTATTCCATTTTGGTAAGCGC   | CCA                         |
| 10   | 94506         | SP-924Gc                     | GTAAGTAAGTGTGTAGTATAGG  | GCTCGACAGATGGACCTCTC     | CCATAACGGACATATATACG        |
| 10   | 2541199       | SP-932Ag                     | AACGACAAAATTCTGCAGCAAC  | CTACTAGTTTGTGGAGAACC     | GACAGCTTCTGCTTGTGTTGT       |
| 10   | 7069227       | SP-948Tg                     | AGCAATCTCATCAGCCAGATC   | GATTTATGCTGCAGCTTGGC     | GTTGACACTTCTAAAGCTG         |

| Chr. | Position (bp) | SNP_marker_name <sup>a</sup> | Forward-primer_seq      | Reverse-primer_seq      | SNP_primer_seq <sup>b</sup> |
|------|---------------|------------------------------|-------------------------|-------------------------|-----------------------------|
| 10   | 9791595       | SP-956Tc                     | GGCGAAAGAATTGGTGTTTCAG  | GGTGCTTAAAGATGAAAGGCCGA | CCATATCATGAAATTCTGATGCAT    |
| 10   | 11824766      | SP-3358Cg                    | GCCTTTCTCATGCTAACAGCA   | GGCATAACATCAGGACCTAG    | AAGCGTTGGTGTGACTAT          |
| 10   | 14502855      | SP-1774Ag                    | CGATAAGCCAGGCATCCT      | AAGGCATAAGCATGCTCGTCA   | GTCAGAAAAATGAGGGAATAC       |
| 10   | 17555159      | SP-981Tc                     | ATGGGCTGGTGCCTACTG      | CCTTGGTCTGTTACATAGCG    | CTTTGATATCCGGGAAGG          |
| 10   | 19468326      | SP-992Gc                     | CCCTTGTAACCTGTTCTTCGTG  | GCTTATCCTCCAAACGACAAC   | CACATGAGCTAGATGATGAT        |
| 10   | 21171786      | SP-1794Tg                    | CTCTTGTTACTCGATTCCGCA   | GAACGTGTAAGCTATATGGCAG  | CCAAGTGATTCAAGAATTTTACA     |
| 10   | 22686557      | SP-1013Ag                    | AATGGTCTTCCCTCCGTTTGC   | GATTACCAGCTTGAGTACTCG   | GTTTTTGTCTCCTTTTCTCAA       |
| 11   | 827222        | SP-2650Ga                    | GCTAATACCTTCTATGAAAGCTC | CGCTCTGCAAAAGGCAAG      | GTGTGTAATTGGAGACAAAGCA      |
| 11   | 2489967       | SP-2816Tc                    | GCCATGGCGTATTATTAGCAC   | GCATGGAATGGATCTGAACTG   | CGCATTCTTTCAGTTTTTCATCT     |
| 11   | 4005384       | SP-2656Ta                    | GATGAAGCTCATCGAGCCT     | GAGCTTGATATGGAGGAAACC   | GTATCAAATATACCTCACGGAC      |
| 11   | 5687240       | SP-1034Ga                    | GAATGTAGATTGACAGATTGCAC | CCTATATATGCTGGCTCCAC    | CACATTACATTAGAGAGAGCA       |
| 11   | 7481468       | SP-3417Ag                    | CGAGAAGAAGTATTCGACACC   | CTCTGCATAAGTGAAAGTGAGC  | CGTCTTTGTTTCCGTCGTAT        |
| 11   | 11922302      | SP-3385Tc                    | CCACCCAATCCTTGCATGG     | GAATTGGAGCTAGTAGTGAGC   | TACATGCAAACTGAACAGC         |
| 11   | 17424916      | SP-2672Ag                    | GTGTTGGTCAATTGTGCCATC   | GAAGTGTCCGTTAACTTTGAGG  | CAACAGCCTGGCTTTTGT          |
| 11   | 19050305      | SP-1062At                    | TGCGCTTCTACATGACCTG     | AAGTGACCTGCTGGAGC       | CTGTGTAAGTGAAGGTACAAA       |
| 11   | 21896773      | SP-1073Tc                    | ACATACGGCGAGTGCAC       | GAGAAGGTTGGAACCGTG      | ATCTTGCGATGCAACCATA         |
| 11   | 24002145      | SP-3403Ct                    | TGAGAGGTGTAGAGAAGAGC    | AGCCTGTAGACCCTCACAG     | CTGAAGAAGCATGCAACTCTT       |
| 11   | 25561274      | SP-1085Tc                    | GGTTGGATATCATCTGAACTGC  | CTCGATCACACTGAACTGC     | GGGCGGATATATATCCAAT         |
| 11   | 27656337      | SP-5095Ga                    | GCAGTACCTTTGTCCTTAACG   | TTTGGTGCTCCTTCTCTGC     | GTCATCTTGCTTCTCTGGG         |
| 12   | 322928        | SP-2831Gc                    | TGTGGTTGGTTGATGTGGAG    | CACAACTCCACCAACCAAG     | CACTATTCCTTCCCGGATT         |
| 12   | 2225082       | SP-1106Ac                    | CAATGTTTCAAGTGTGGGAGCT  | CTCAGCTACCTAGCTTATGAG   | TTGCTTCAGTAAGAGAGGAC        |
| 12   | 3849039       | SP-1115Ac                    | AAGCATTGGCGCCTCATCG     | TAGTGCCTAGGAGCTCTCTG    | TTTCTGCCTGGAGAAACACA        |
| 12   | 5510849       | SP-3499Ta                    | TCACAGAGGCCACTGTTCTG    | CAGATGCCATGTTAGTCCTTC   | ATCGATGAAATGCTGGGAGA        |
| 12   | 10041580      | SP-1828Tc                    | AACGTTAGGCAGGTGCAG      | GACGATGAACAACTGGGAAC    | CGTCATCGTCATATATAGCCT       |
| 12   | 12334210      | SP-3455Ag                    | CTCACTTTGAGCATACTCCTC   | CGTTGGTCCACAATCTGAC     | ACTTGACTCCTCACTCAC          |
| 12   | 14689883      | SP-2687At                    | ACTACAGTGATGCTTCTGGC    | GTATTTGGCAGTGCGTTCC     | GACGTAGTAGCCATATTGGA        |
| 12   | 17499935      | SP-3747Cg                    | CTATTGACCTTGTGCTGGTAC   | CTCAAGCTTAAGTGTGTTGC    | CAGTGTTTAAGCTTAACAAAGCTT    |
| 12   | 21257971      | SP-2697Ct                    | ATGATTTGACTCCCGTAGTCC   | GGATGAGAGCCTAAGCTTAC    | GTAATCCTTGCTTAGTTAGTATTA    |
| 12   | 23828918      | SP-1160Tc                    | ACGTCATGCACCCTGATCG     | GGGCTTCCATGGTTCATGC     | AACTCGTCGTTTCTAGGATC        |
| 12   | 27011209      | SP-2705Ag                    | CTTCAGCGGGAAGTCTGTC     | GTTAAGGTATGATCCGTTGCC   | TCTTAGGCATATCCCTTTC         |

<sup>a</sup> Each SNP position is located at 1bp-downstream of the corresponding SNP\_primer\_seq.

<sup>b</sup> A capital letter and a small letter following each SNP\_primer\_name indicates a Koshihikari-allele and a rufipogon-allele of the corresponding SNP.
